# Supplementary material for: Impact of COVID-19 Pandemic on Emergency Calls and Trauma Emergency Calls in Hangzhou
Source: Research Square preprint supplement (doi:10.21203/rs.3.rs-102322/v1), 2020-11-09
Supplement: Supplementary file 1 [file 89cd668ca9dedb69c6648816.docx]

| time | emergency calls | ambulance assignments | rescue personnel first-aid calls | trauma emergency calls |  |  |  |  |  |  |  |  |  |  |  |
| --- | --- | --- | --- | --- | --- | --- | --- | --- | --- | --- | --- | --- | --- | --- | --- |
| 2020/1/23 | 574 | 189 | 134 | 30 |  |  |  |  |  |  |  |  |  |  |  |
| 2020/1/24 | 553 | 173 | 134 | 24 |  |  |  |  |  |  |  |  |  |  |  |
| 2020/1/25 | 489 | 168 | 126 | 31 |  |  |  |  |  |  |  |  |  |  |  |
| 2020/1/26 | 459 | 147 | 105 | 21 |  |  |  |  |  |  |  |  |  |  |  |
| 2020/1/27 | 465 | 184 | 131 | 31 |  |  |  |  |  |  |  |  |  |  |  |
| 2020/1/28 | 478 | 171 | 123 | 23 |  |  |  |  |  |  |  |  |  |  |  |
| 2020/1/29 | 505 | 160 | 120 | 24 |  |  |  |  |  |  |  |  |  |  |  |
| 2020/1/30 | 529 | 163 | 122 | 25 |  |  |  |  |  |  |  |  |  |  |  |
| 2020/1/31 | 447 | 139 | 108 | 18 |  |  |  |  |  |  |  |  |  |  |  |
| 2020/2/1 | 390 | 117 | 87 | 21 |  |  |  |  |  |  |  |  |  |  |  |
| 2020/2/2 | 500 | 150 | 106 | 34 |  |  |  |  |  |  |  |  |  |  |  |
| 2020/2/3 | 594 | 166 | 114 | 15 |  |  |  |  |  |  |  |  |  |  |  |
| 2020/2/4 | 532 | 138 | 102 | 16 |  |  |  |  |  |  |  |  |  |  |  |
| 2020/2/5 | 539 | 160 | 119 | 21 |  |  |  |  |  |  |  |  |  |  |  |
| 2020/2/6 | 634 | 191 | 136 | 31 |  |  |  |  |  |  |  |  |  |  |  |
| 2020/2/7 | 553 | 162 | 112 | 10 |  |  |  |  |  |  |  |  |  |  |  |
| 2020/2/8 | 569 | 183 | 141 | 20 |  |  |  |  |  |  |  |  |  |  |  |
| 2020/2/9 | 520 | 171 | 126 | 31 |  |  |  |  |  |  |  |  |  |  |  |
| 2020/2/10 | 570 | 186 | 140 | 21 |  |  |  |  |  |  |  |  |  |  |  |
| 2020/2/11 | 475 | 147 | 107 | 21 |  |  |  |  |  |  |  |  |  |  |  |
| 2020/2/12 | 562 | 177 | 136 | 29 |  |  |  |  |  |  |  |  |  |  |  |
| 2020/2/13 | 558 | 182 | 133 | 27 |  |  |  |  |  |  |  |  |  |  |  |
| 2020/2/14 | 489 | 146 | 120 | 19 |  |  |  |  |  |  |  |  |  |  |  |
| 2020/2/15 | 371 | 123 | 98 | 23 |  |  |  |  |  |  |  |  |  |  |  |
| 2020/2/16 | 492 | 169 | 116 | 43 |  |  |  |  |  |  |  |  |  |  |  |
| 2020/2/17 | 481 | 161 | 121 | 43 |  |  |  |  |  |  |  |  |  |  |  |
| 2020/2/18 | 516 | 149 | 102 | 29 |  |  |  |  |  |  |  |  |  |  |  |
| 2020/2/19 | 500 | 155 | 111 | 27 |  |  |  |  |  |  |  |  |  |  |  |
| 2020/2/20 | 511 | 147 | 100 | 36 |  |  |  |  |  |  |  |  |  |  |  |
| 2020/2/21 | 455 | 143 | 113 | 23 |  |  |  |  |  |  |  |  |  |  |  |
| 2020/2/22 | 495 | 137 | 108 | 27 |  |  |  |  |  |  |  |  |  |  |  |
| 2020/2/23 | 575 | 167 | 116 | 31 |  |  |  |  |  |  |  |  |  |  |  |
| 2020/2/24 | 537 | 149 | 110 | 26 |  |  |  |  |  |  |  |  |  |  |  |
| 2020/2/25 | 599 | 175 | 126 | 30 |  |  |  |  |  |  |  |  |  |  |  |
| 2020/2/26 | 542 | 169 | 123 | 38 |  |  |  |  |  |  |  |  |  |  |  |
| 2020/2/27 | 558 | 170 | 115 | 43 |  |  |  |  |  |  |  |  |  |  |  |
| 2020/2/28 | 527 | 159 | 121 | 33 |  |  |  |  |  |  |  |  |  |  |  |
| 2020/2/29 | 455 | 139 | 107 | 18 |  |  |  |  |  |  |  |  |  |  |  |
| 2020/3/1 | 568 | 163 | 110 | 36 |  |  |  |  |  |  |  |  |  |  |  |
| 2020/3/2 | 600 | 165 | 130 | 46 |  |  |  |  |  |  |  |  |  |  |  |
| 2020/3/3 | 529 | 147 | 111 | 25 |  |  |  |  |  |  |  |  |  |  |  |
| 2020/3/4 | 606 | 168 | 118 | 33 |  |  |  |  |  |  |  |  |  |  |  |
| 2020/3/5 | 667 | 161 | 114 | 41 |  |  |  |  |  |  |  |  |  |  |  |
| 2020/3/6 | 543 | 159 | 119 | 35 |  |  |  |  |  |  |  |  |  |  |  |
| 2020/3/7 | 511 | 144 | 111 | 36 |  |  |  |  |  |  |  |  |  |  |  |
| 2020/3/8 | 804 | 202 | 156 | 58 |  |  |  |  |  |  |  |  |  |  |  |
| 2020/3/9 | 656 | 194 | 147 | 57 |  |  |  |  |  |  |  |  |  |  |  |
| 2020/3/10 | 623 | 177 | 147 | 43 |  |  |  |  |  |  |  |  |  |  |  |
| 2020/3/11 | 604 | 176 | 131 | 37 |  |  |  |  |  |  |  |  |  |  |  |
| 2020/3/12 | 609 | 174 | 128 | 36 |  |  |  |  |  |  |  |  |  |  |  |
| 2020/3/13 | 569 | 179 | 142 | 45 |  |  |  |  |  |  |  |  |  |  |  |
| 2020/3/14 | 609 | 161 | 135 | 40 |  |  |  |  |  |  |  |  |  |  |  |
| 2020/3/15 | 710 | 190 | 135 | 53 |  |  |  |  |  |  |  |  |  |  |  |
|  |  |  |  |  |  |  |  |  |  |  |  |  |  |  |  |
| total | 28806 | 8642 | 6403 | 1634 |  |  |  |  |  |  |  |  |  |  |  |

| time | emergency calls | ambulance assignments | rescue personnel first-aid calls | trauma emergency calls |  |  |  |  |  |  |  |  |  |  |  |
| --- | --- | --- | --- | --- | --- | --- | --- | --- | --- | --- | --- | --- | --- | --- | --- |
| 2019/1/23 | 808 | 272 | 182 | 59 |  |  |  |  |  |  |  |  |  |  |  |
| 2019/1/24 | 851 | 293 | 211 | 65 |  |  |  |  |  |  |  |  |  |  |  |
| 2019/1/25 | 751 | 269 | 197 | 62 |  |  |  |  |  |  |  |  |  |  |  |
| 2019/1/26 | 761 | 272 | 180 | 65 |  |  |  |  |  |  |  |  |  |  |  |
| 2019/1/27 | 842 | 276 | 184 | 56 |  |  |  |  |  |  |  |  |  |  |  |
| 2019/1/28 | 748 | 280 | 185 | 71 |  |  |  |  |  |  |  |  |  |  |  |
| 2019/1/29 | 719 | 273 | 175 | 59 |  |  |  |  |  |  |  |  |  |  |  |
| 2019/1/30 | 697 | 250 | 165 | 55 |  |  |  |  |  |  |  |  |  |  |  |
| 2019/1/31 | 680 | 238 | 151 | 34 |  |  |  |  |  |  |  |  |  |  |  |
| 2019/2/1 | 637 | 218 | 136 | 37 |  |  |  |  |  |  |  |  |  |  |  |
| 2019/2/2 | 544 | 189 | 127 | 33 |  |  |  |  |  |  |  |  |  |  |  |
| 2019/2/3 | 455 | 180 | 114 | 36 |  |  |  |  |  |  |  |  |  |  |  |
| 2019/2/4 | 502 | 197 | 130 | 37 |  |  |  |  |  |  |  |  |  |  |  |
| 2019/2/5 | 448 | 183 | 126 | 39 |  |  |  |  |  |  |  |  |  |  |  |
| 2019/2/6 | 415 | 136 | 102 | 31 |  |  |  |  |  |  |  |  |  |  |  |
| 2019/2/7 | 423 | 149 | 110 | 26 |  |  |  |  |  |  |  |  |  |  |  |
| 2019/2/8 | 401 | 179 | 141 | 31 |  |  |  |  |  |  |  |  |  |  |  |
| 2019/2/9 | 405 | 179 | 135 | 38 |  |  |  |  |  |  |  |  |  |  |  |
| 2019/2/10 | 654 | 244 | 160 | 47 |  |  |  |  |  |  |  |  |  |  |  |
| 2019/2/11 | 649 | 232 | 156 | 47 |  |  |  |  |  |  |  |  |  |  |  |
| 2019/2/12 | 653 | 240 | 163 | 50 |  |  |  |  |  |  |  |  |  |  |  |
| 2019/2/13 | 634 | 224 | 152 | 44 |  |  |  |  |  |  |  |  |  |  |  |
| 2019/2/14 | 640 | 242 | 168 | 67 |  |  |  |  |  |  |  |  |  |  |  |
| 2019/2/15 | 556 | 195 | 140 | 53 |  |  |  |  |  |  |  |  |  |  |  |
| 2019/2/16 | 606 | 223 | 159 | 47 |  |  |  |  |  |  |  |  |  |  |  |
| 2019/2/17 | 720 | 253 | 174 | 52 |  |  |  |  |  |  |  |  |  |  |  |
| 2019/2/18 | 669 | 238 | 153 | 56 |  |  |  |  |  |  |  |  |  |  |  |
| 2019/2/19 | 715 | 248 | 172 | 55 |  |  |  |  |  |  |  |  |  |  |  |
| 2019/2/20 | 686 | 252 | 171 | 69 |  |  |  |  |  |  |  |  |  |  |  |
| 2019/2/21 | 740 | 270 | 191 | 62 |  |  |  |  |  |  |  |  |  |  |  |
| 2019/2/22 | 672 | 227 | 157 | 53 |  |  |  |  |  |  |  |  |  |  |  |
| 2019/2/23 | 677 | 233 | 164 | 49 |  |  |  |  |  |  |  |  |  |  |  |
| 2019/2/24 | 749 | 247 | 159 | 54 |  |  |  |  |  |  |  |  |  |  |  |
| 2019/2/25 | 716 | 225 | 142 | 55 |  |  |  |  |  |  |  |  |  |  |  |
| 2019/2/26 | 684 | 216 | 145 | 45 |  |  |  |  |  |  |  |  |  |  |  |
| 2019/2/27 | 686 | 241 | 154 | 57 |  |  |  |  |  |  |  |  |  |  |  |
| 2019/2/28 | 718 | 237 | 164 | 53 |  |  |  |  |  |  |  |  |  |  |  |
| 2019/3/1 | 738 | 239 | 162 | 59 |  |  |  |  |  |  |  |  |  |  |  |
| 2019/3/2 | 658 | 229 | 166 | 51 |  |  |  |  |  |  |  |  |  |  |  |
| 2019/3/3 | 677 | 230 | 136 | 37 |  |  |  |  |  |  |  |  |  |  |  |
| 2019/3/4 | 702 | 236 | 156 | 51 |  |  |  |  |  |  |  |  |  |  |  |
| 2019/3/5 | 647 | 230 | 155 | 59 |  |  |  |  |  |  |  |  |  |  |  |
| 2019/3/6 | 709 | 243 | 168 | 69 |  |  |  |  |  |  |  |  |  |  |  |
| 2019/3/7 | 736 | 239 | 169 | 55 |  |  |  |  |  |  |  |  |  |  |  |
| 2019/3/8 | 739 | 257 | 183 | 62 |  |  |  |  |  |  |  |  |  |  |  |
| 2019/3/9 | 717 | 231 | 140 | 63 |  |  |  |  |  |  |  |  |  |  |  |
| 2019/3/10 | 720 | 250 | 174 | 71 |  |  |  |  |  |  |  |  |  |  |  |
| 2019/3/11 | 747 | 249 | 166 | 81 |  |  |  |  |  |  |  |  |  |  |  |
| 2019/3/12 | 805 | 252 | 167 | 59 |  |  |  |  |  |  |  |  |  |  |  |
| 2019/3/13 | 720 | 266 | 175 | 78 |  |  |  |  |  |  |  |  |  |  |  |
| 2019/3/14 | 782 | 283 | 171 | 59 |  |  |  |  |  |  |  |  |  |  |  |
| 2019/3/15 | 731 | 251 | 163 | 60 |  |  |  |  |  |  |  |  |  |  |  |
|  |  |  |  |  |  |  |  |  |  |  |  |  |  |  |  |
| total | 34739 | 12205 | 8246 | 2763 |  |  |  |  |  |  |  |  |  |  |  |
